# Supplementary material for: SAXS unveils porous anodes for potassium-ion batteries: dynamic evolution of pore structures in Fe@Fe2O3/PCNFs composite nanofibers
Source: Royal Society of Chemistry journal article supplement (doi:10.1039/d3cp05994d), 2024-01-01
Supplement: d3cp05994d1.pdf [file d3cp05994d1.pdf]

## **SAXS “unveils” porous anodes for potassium-ion batteries: dynamic evolution of pore structure in Fe@Fe<sub>2</sub>O<sub>3</sub>/PCNFs composite nanofibers**

Ruiqi Shao<sup>a</sup>, Yingjie Dong<sup>a</sup>, Qingqing Wu<sup>a</sup>, Haiting Shi<sup>\*a</sup>, Jinxi Bao<sup>a</sup>, Feng Tian<sup>b</sup>, Tianyu Li<sup>a</sup>, Zhiwei Xu<sup>\*a</sup>

<sup>a</sup> State Key Laboratory of Separation Membranes and Membrane Processes, School of Textile Science and Engineering, Tiangong University, Tianjin 300387, China.

<sup>b</sup> Shanghai Synchrotron Radiation Facility, Zhangjiang Lab, Shanghai Advanced Research Institute, Chinese Academy of Sciences, Shanghai 201204, China

\*Corresponding author: shihaiting@tiangong.edu.cn, xuzhiwei@tiangong.edu.cn

### **Supporting Information**

#### **Content**

**Fig. S1 CV curves of Fe@Fe<sub>2</sub>O<sub>3</sub>/PCNFs composite in Na-ion cell.**

**Fig. S2 Rate capability at a current density of 100, 200, 500, 1000, 2000 and 100 mA g<sup>-1</sup> of Fe@Fe<sub>2</sub>O<sub>3</sub>/PCNFs composite in Na-ion cell.**

**Fig. S3 Charge/discharge specific capacity and coulombic efficiency measured with 150 cycles at a current density of 100 mA g<sup>-1</sup>.**

**Fig. S4 Long-term cycling performance at 1000 mA g<sup>-1</sup>.**

**Fig. S5 CV curves at different scan rate of 0.5, 1.0, 1.5, 2.0, 2.5 mV s<sup>-1</sup>.**

**Fig. S6 b value.**

**Fig. S7 Capacitance and diffusion contribution ratio at different scan rate of 0.5, 1.0, 1.5, 2.0, 2.5 mV s<sup>-1</sup> of Fe@Fe<sub>2</sub>O<sub>3</sub>/PCNFs composite in Na-ion cell.**

**Fig. S8 Test results of sodium ion cell of Fe@Fe<sub>2</sub>O<sub>3</sub>/PCNFs composite: (a) the first three cycles of charge /discharge curve at a scan rate of 0.1 mV s<sup>-1</sup>, (b) EIS spectrum of the initial state, discharging to 1.5 V, 1.3 V, 1.1 V and (c) EIS spectrum when discharging to 1.1 V, 0.9 V, 0.7 V, 0.5 V, 0.3 V, 0.1 V.**

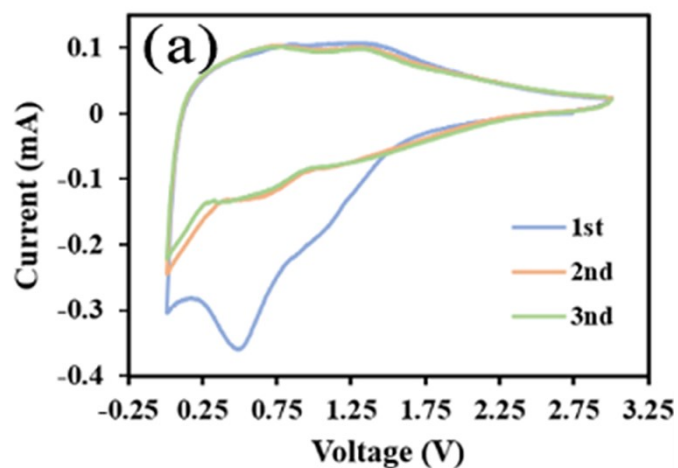

Fig. S1 CV curves of Fe@Fe<sub>2</sub>O<sub>3</sub>/PCNFs composite in Na-ion cell.

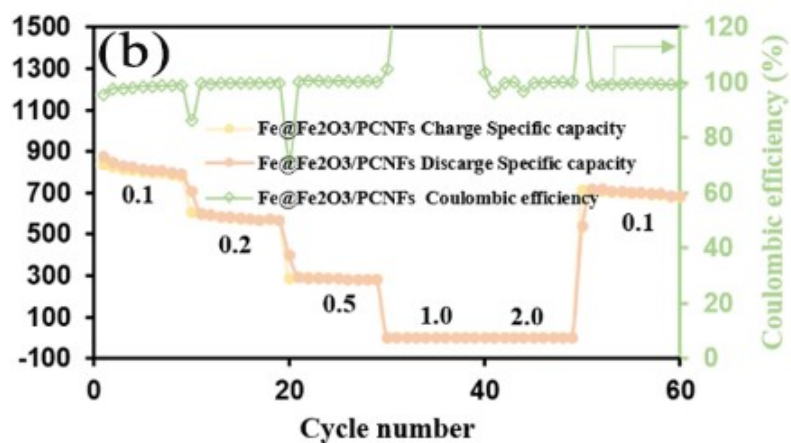

Fig. S2 Rate capability at a current density of 100, 200, 500, 1000, 2000 and 100 mA g<sup>-1</sup> of Fe@Fe<sub>2</sub>O<sub>3</sub>/PCNFs composite in Na-ion cell.

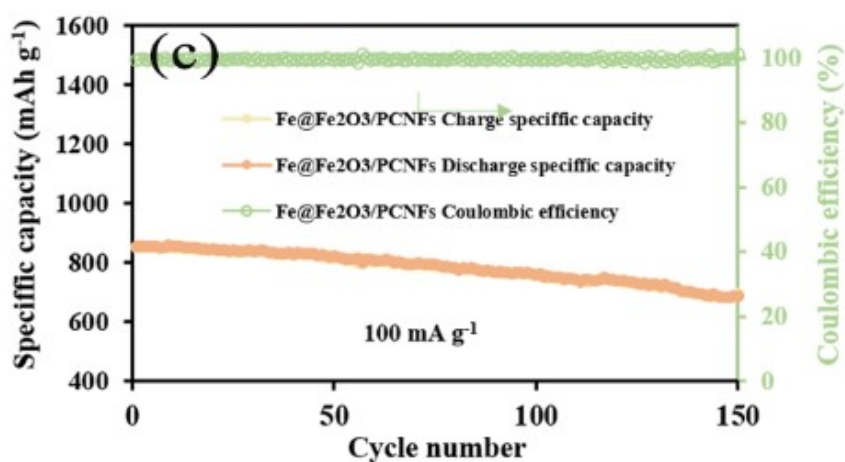

Fig. S3 Charge/discharge specific capacity and coulombic efficiency measured with 150 cycles at a current density of 100 mA g<sup>-1</sup>.

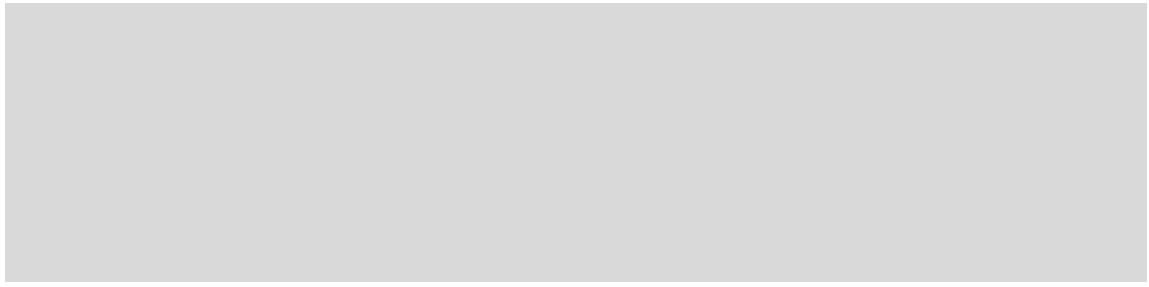

**Fig. S4** Long-term cycling performance at 1000 mA g<sup>-1</sup>.

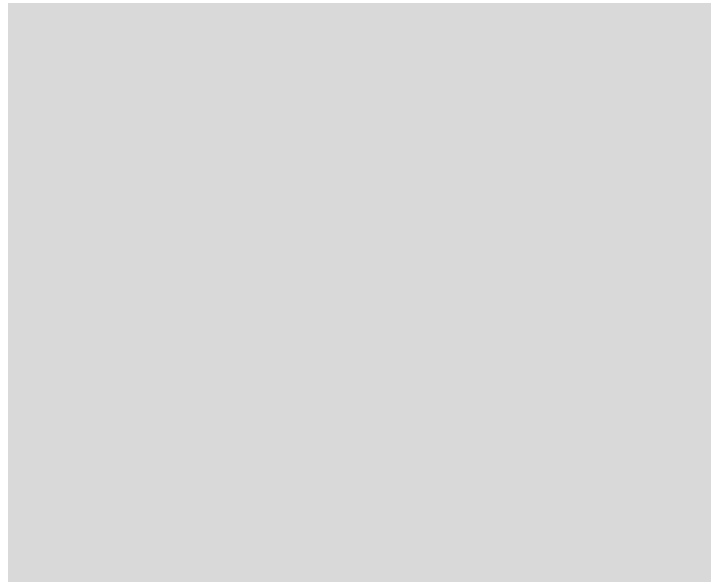

**Fig. S5** CV curves at different scan rate of 0.5, 1.0, 1.5, 2.0, 2.5 mV s<sup>-1</sup>.

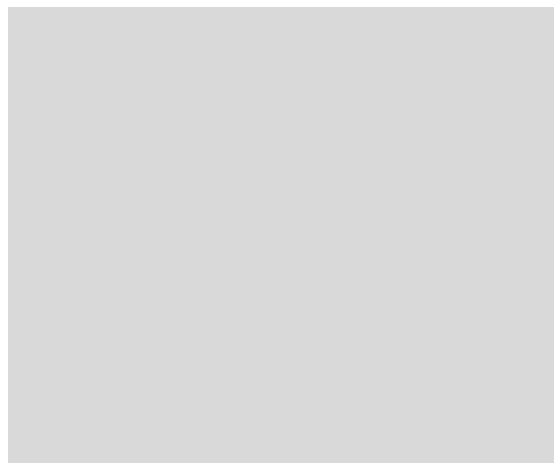

**Fig. S6** *b* value.

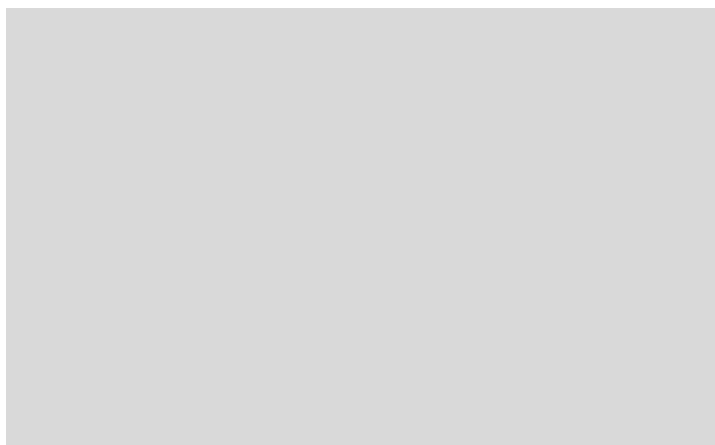

**Fig. S7** Capacitance and diffusion contribution ratio at different scan rate of 0.5, 1.0, 1.5, 2.0, 2.5  $\text{mV s}^{-1}$  of  $\text{Fe@Fe}_2\text{O}_3/\text{PCNFs}$  composite in Na-ion cell.

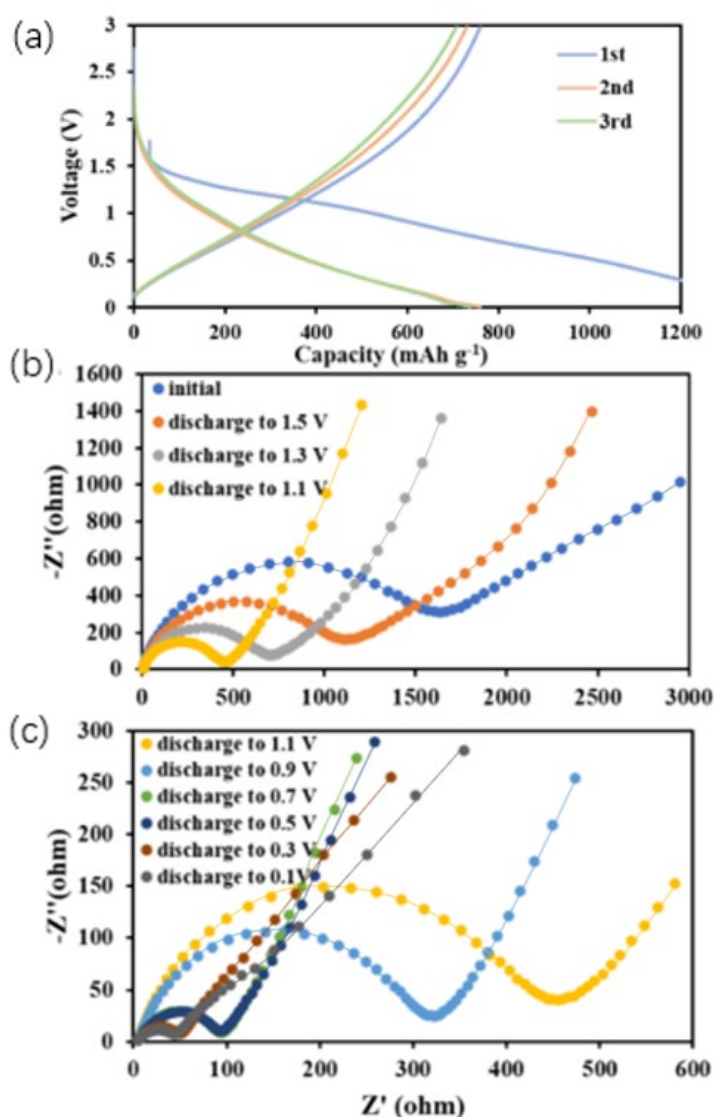

**Fig. S8** Test results of sodium ion cell of  $\text{Fe@Fe}_2\text{O}_3/\text{PCNFs}$  composite: (a) the first three cycles of charge /discharge curve at a scan rate of  $0.1 \text{ mV s}^{-1}$ , (b) EIS spectrum of the initial state, discharging to 1.5 V, 1.3 V, 1.1 V and (c) EIS spectrum when discharging to 1.1 V, 0.9 V, 0.7 V, 0.5 V, 0.3 V, 0.1 V.
